# Supplementary material
Source: PubMed Central journal article supplement (PMC5835796)
Supplement: JOA-232-604-s001.pdf [file JOA-232-604-s001.pdf]

Supplementary Information for

**Growth Patterns and Variation Among Early Theropods**

C. T. Griffin, Department of Geosciences, Virginia Polytechnic Institute and State University,

ctgriff@vt.edu.

**This file includes:**

Supplementary Methods 1–2

Supplementary Figures 1–11

Supplementary Data 1–2

Captions for Supplementary Data 3–12

Captions for Supplementary Tables 1–3

**Other supplementary materials for this study include the following:**

Supplementary Data 3–12

Supplementary Tables 1–3



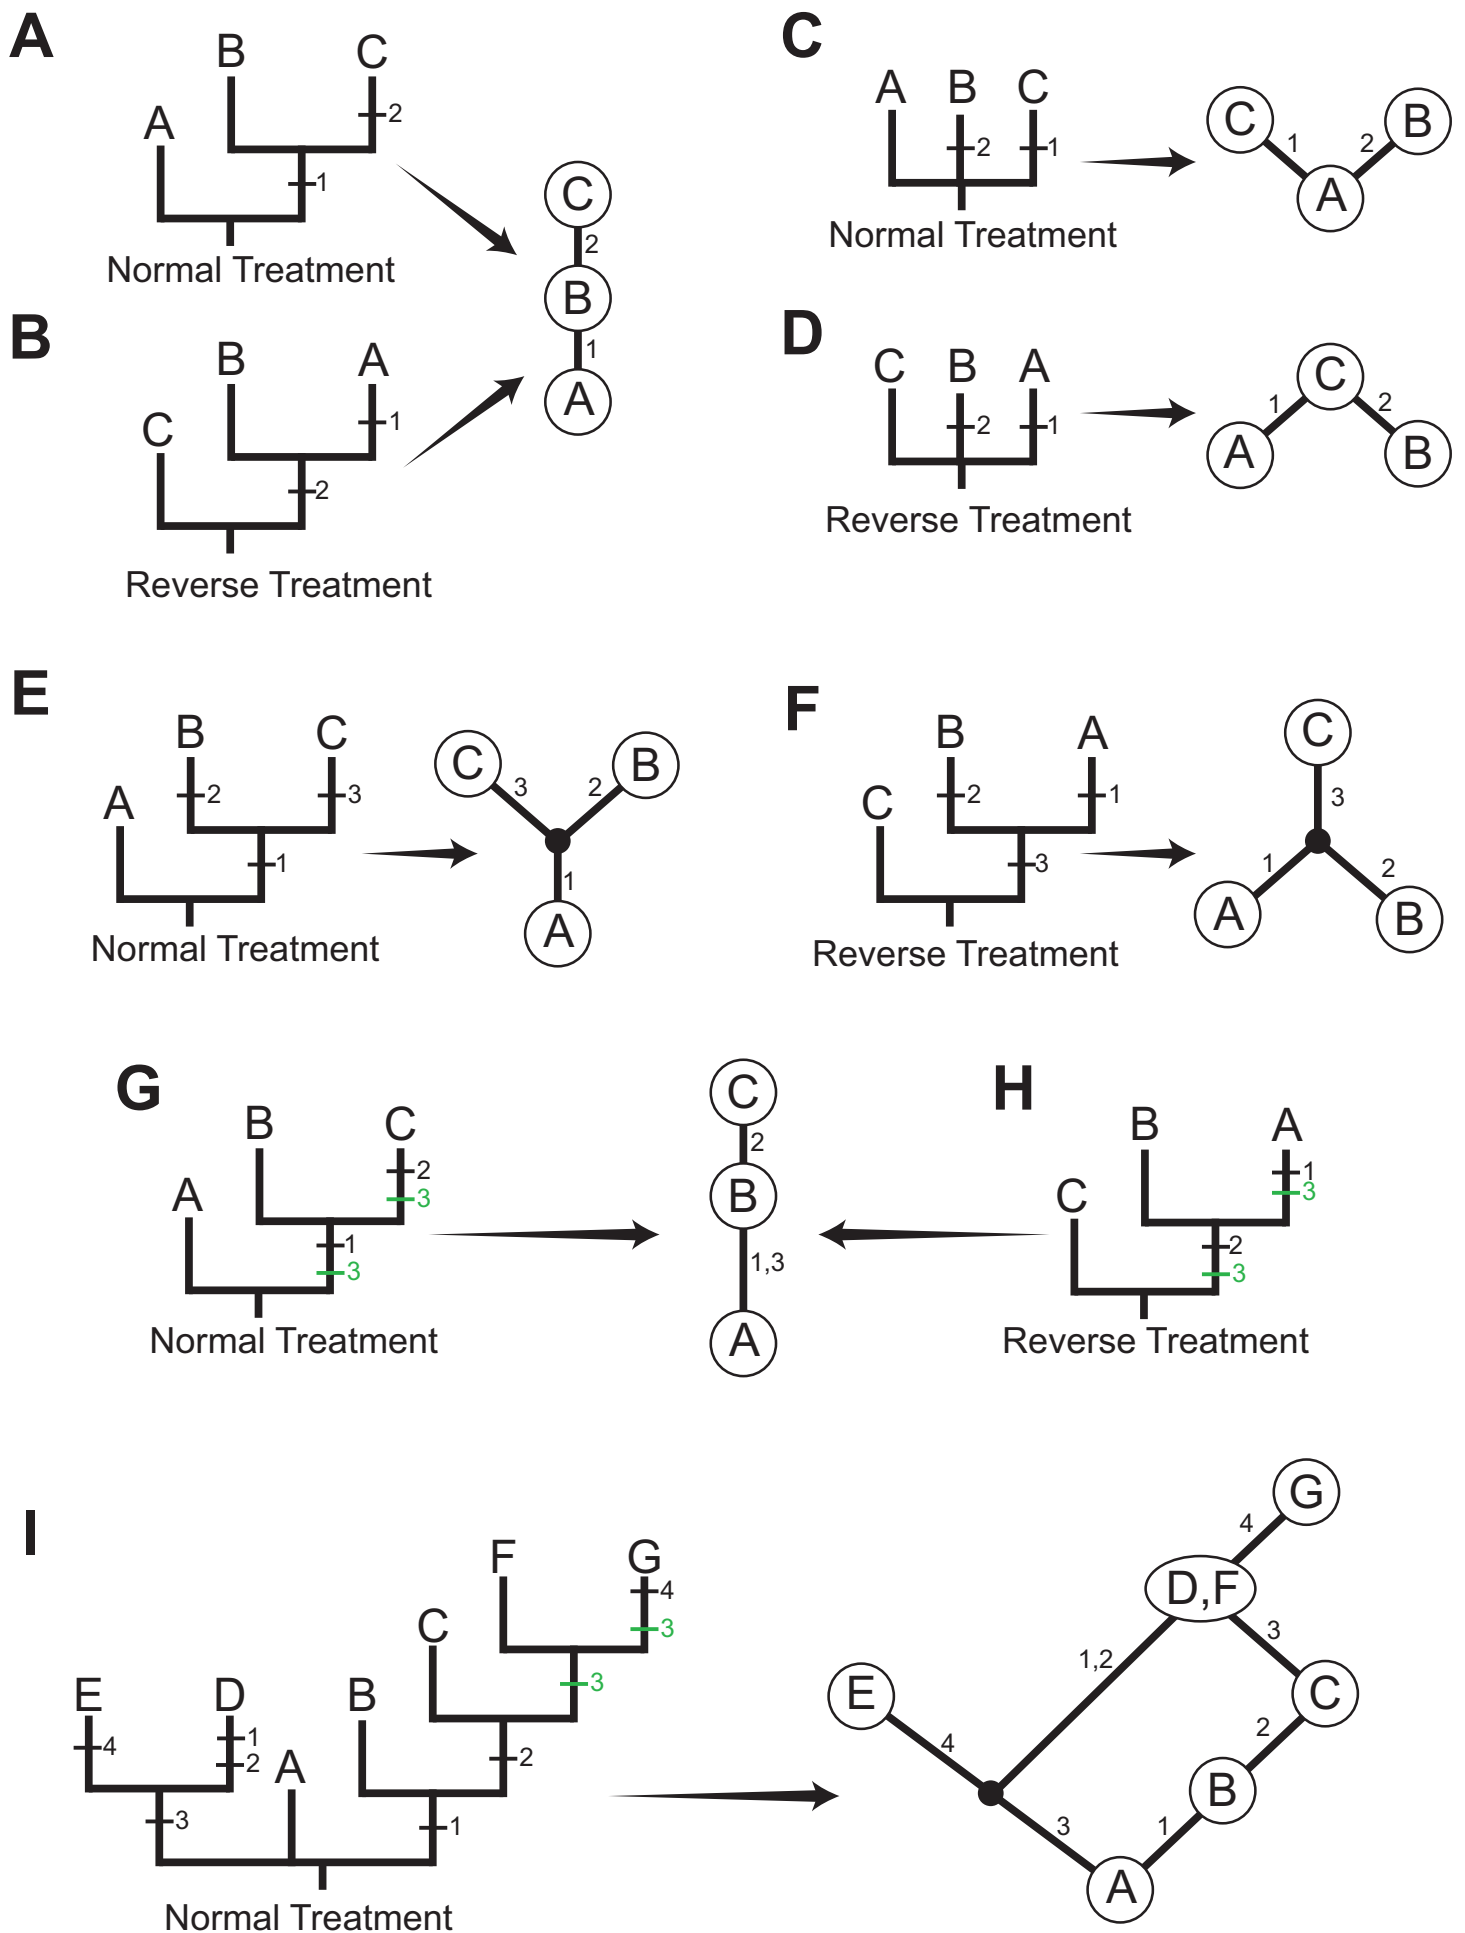

**Supplementary Methods 2.** Transforming trees returned by PAUP\* into partial OSA reticulating diagrams. **A** and **B** show basic character state transformations between semaphoronts in both normal and reverse treatments. **C** and **D** show how to transform trees containing polytomies in both normal and reverse treatments. **E** and **F** illustrate how predicted semaphoronts (semaphoronts with support weight of 0) are determined, in both treatments. **G** and **H** show how to place ambiguous character transformations (in green) onto the reticulating diagram in both treatments; essentially, it is an ACCTRAN optimization, with the assumption being that the character appeared in the earliest place possible during ontogeny. **I** shows a more complex example, illustrating how all these transformations can be used to form complex reticulating diagrams (this example is only in normal treatment).

**Supplementary Figure 1.** Detailed ontogenetic sequence analysis reticulating diagram for the full postcrania dataset of 27 ontogenetic characters of *Coelophysis bauri*.

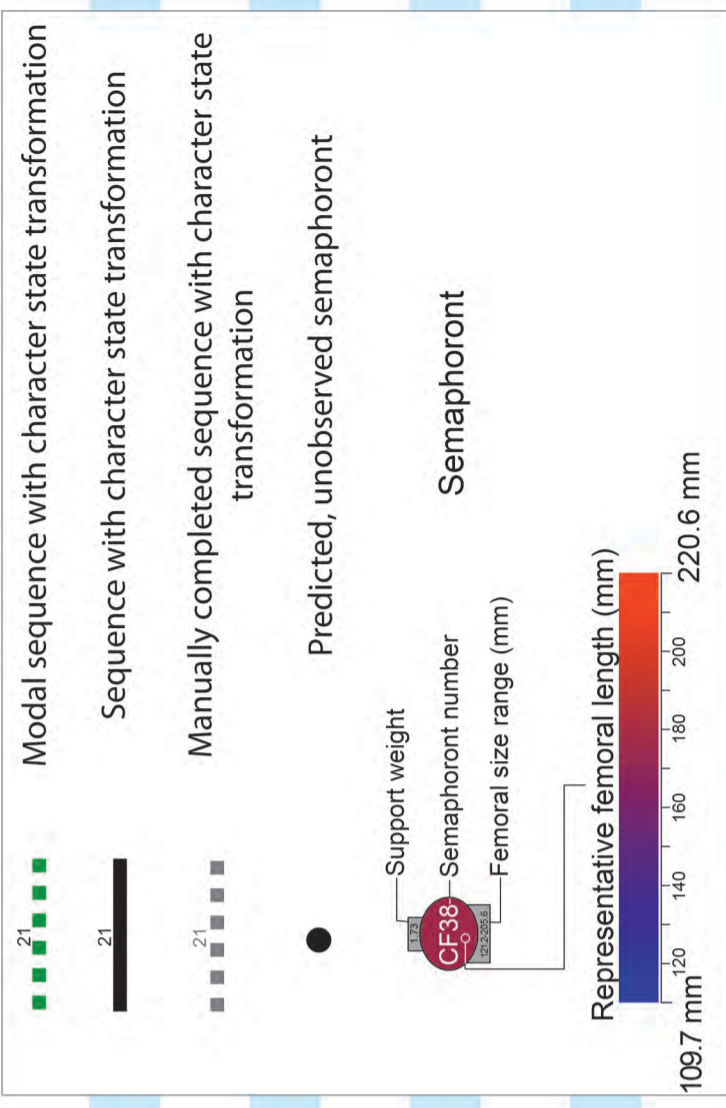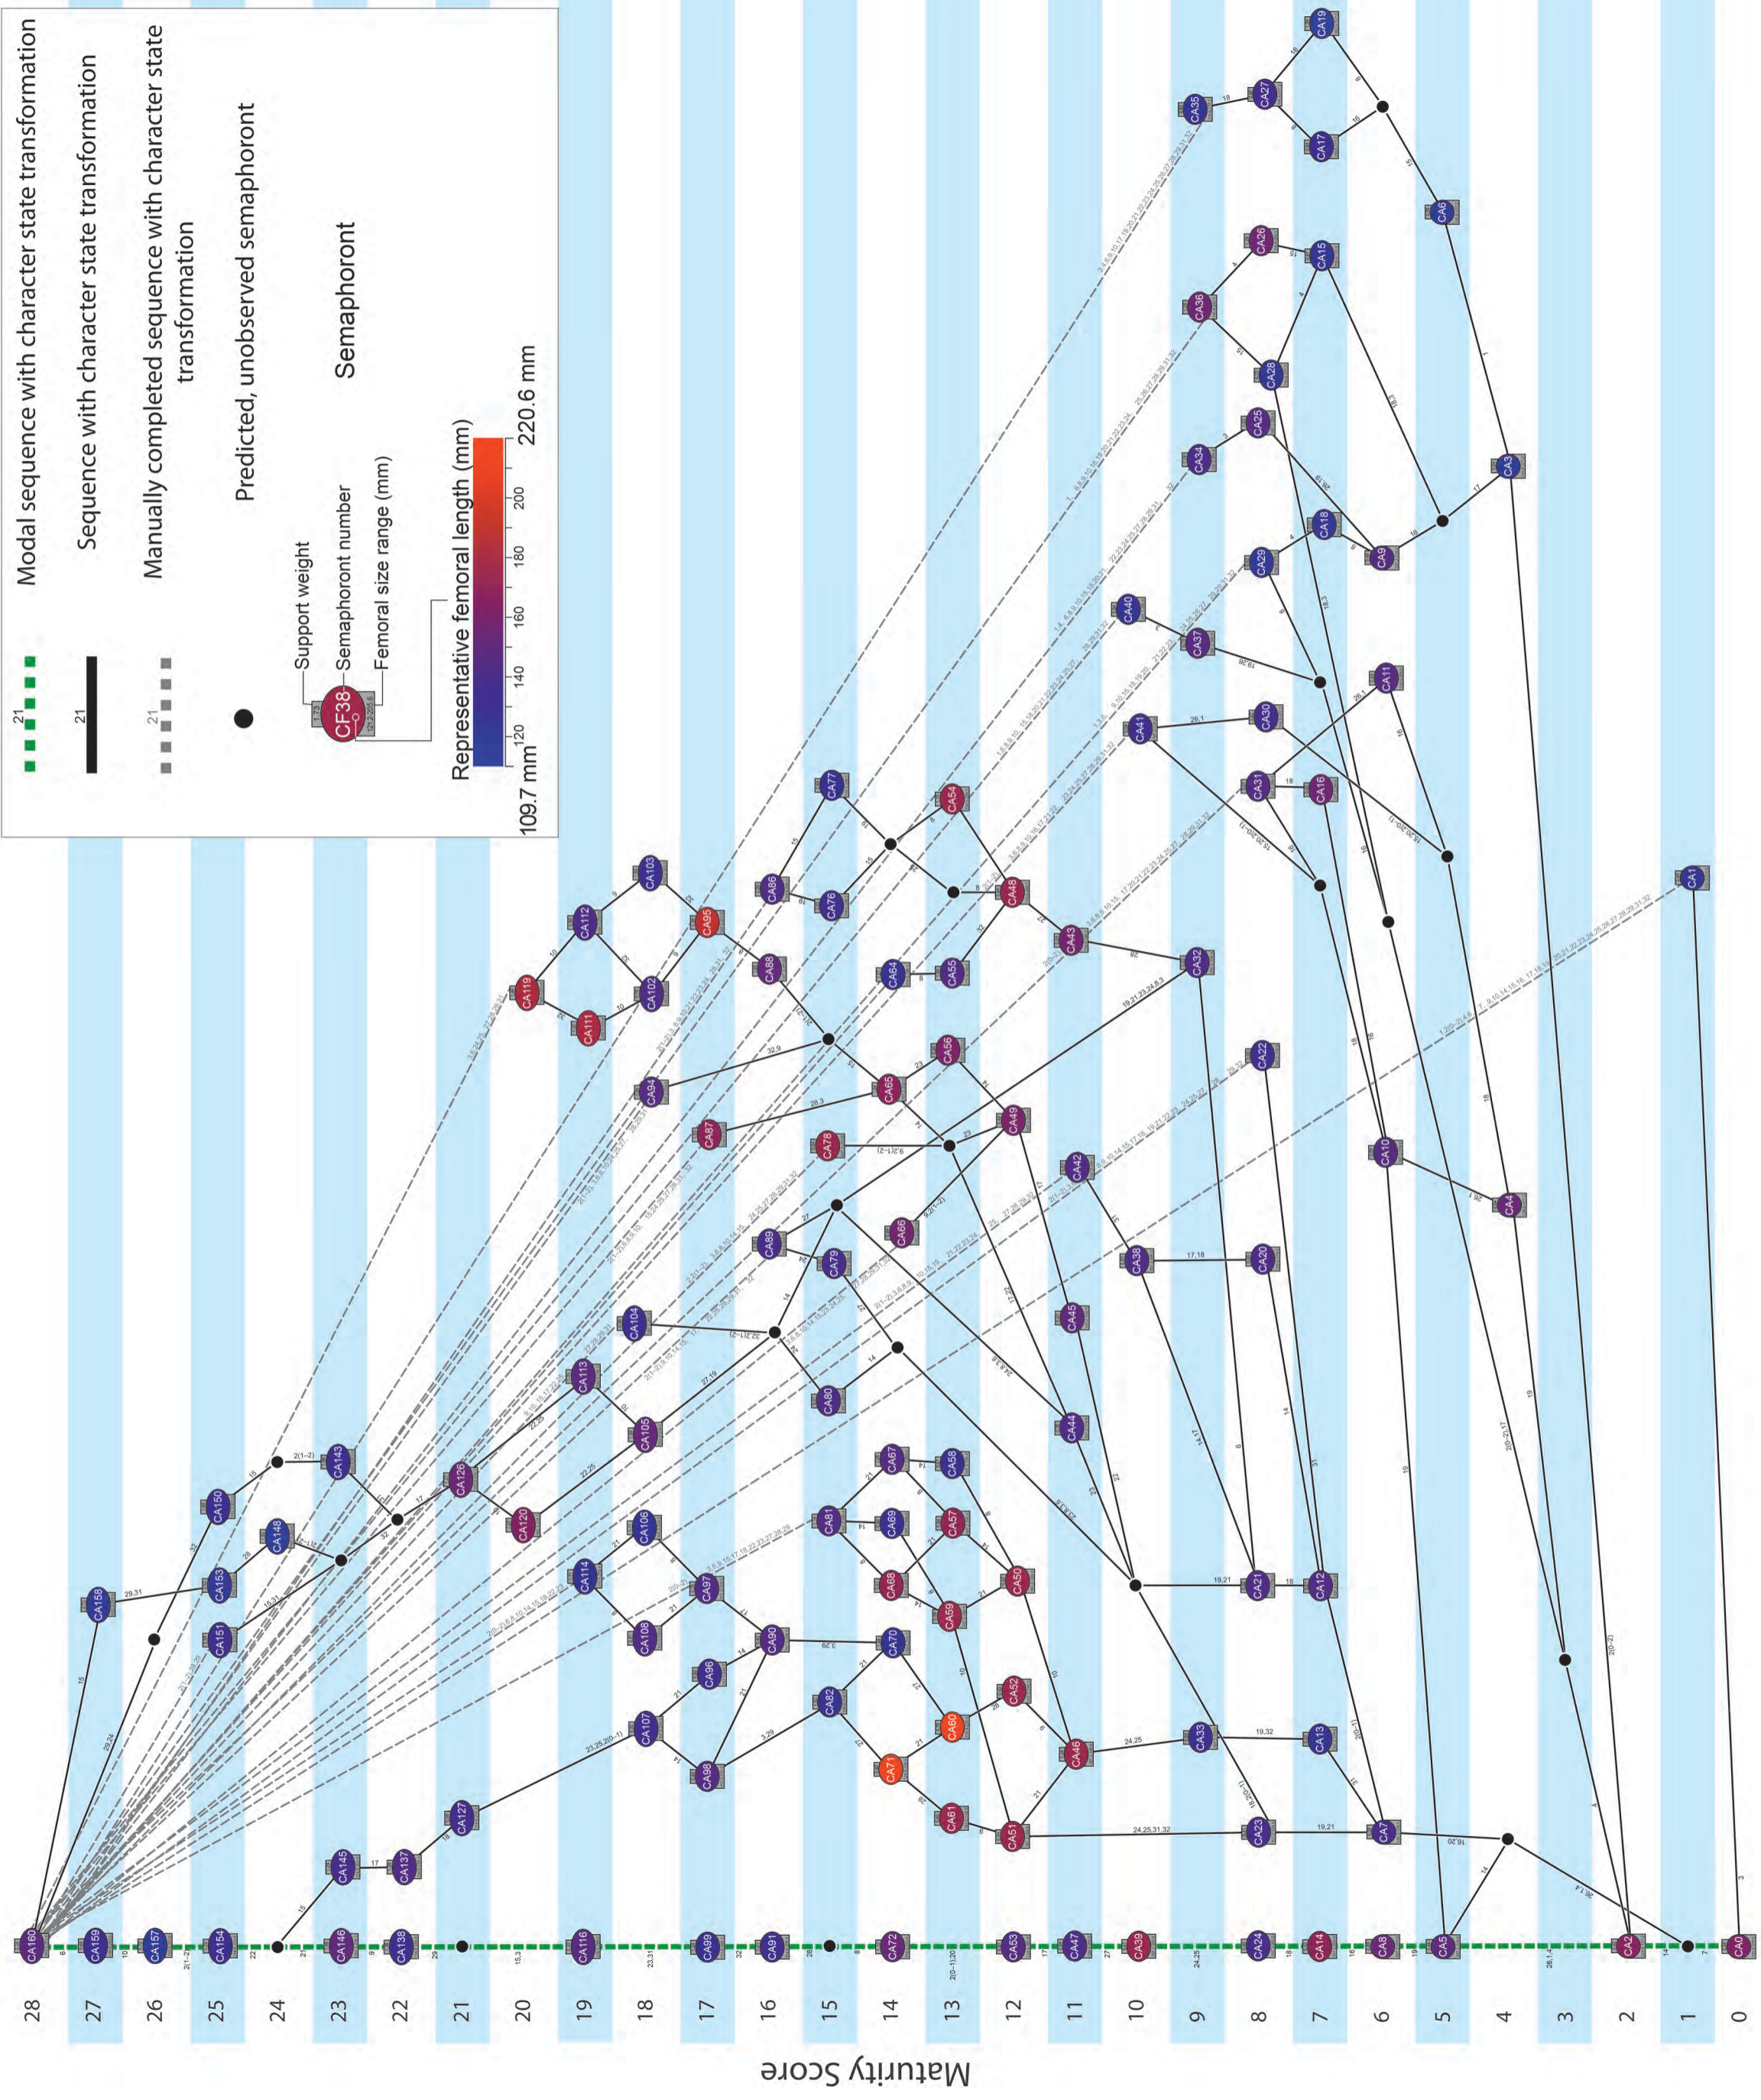

**Supplementary Figure 2.** Detailed ontogenetic sequence analysis reticulating diagram for the femoral dataset of 10 ontogenetic characters of *Coelophysis bauri*.



**Supplementary Figure 3.** Detailed ontogenetic sequence analysis reticulating diagram for the femoral dataset of 13 ontogenetic characters of *Megapnosaurus rhodesiensis*.



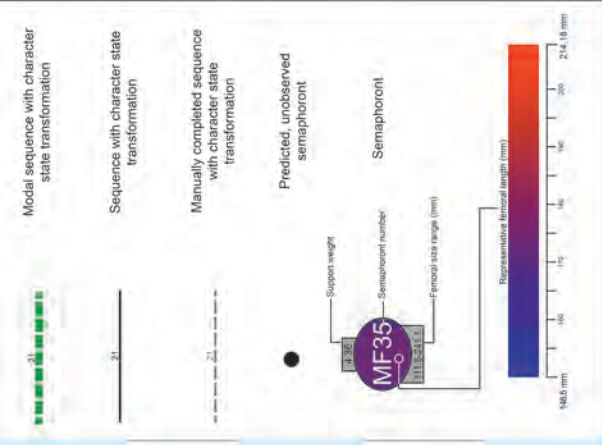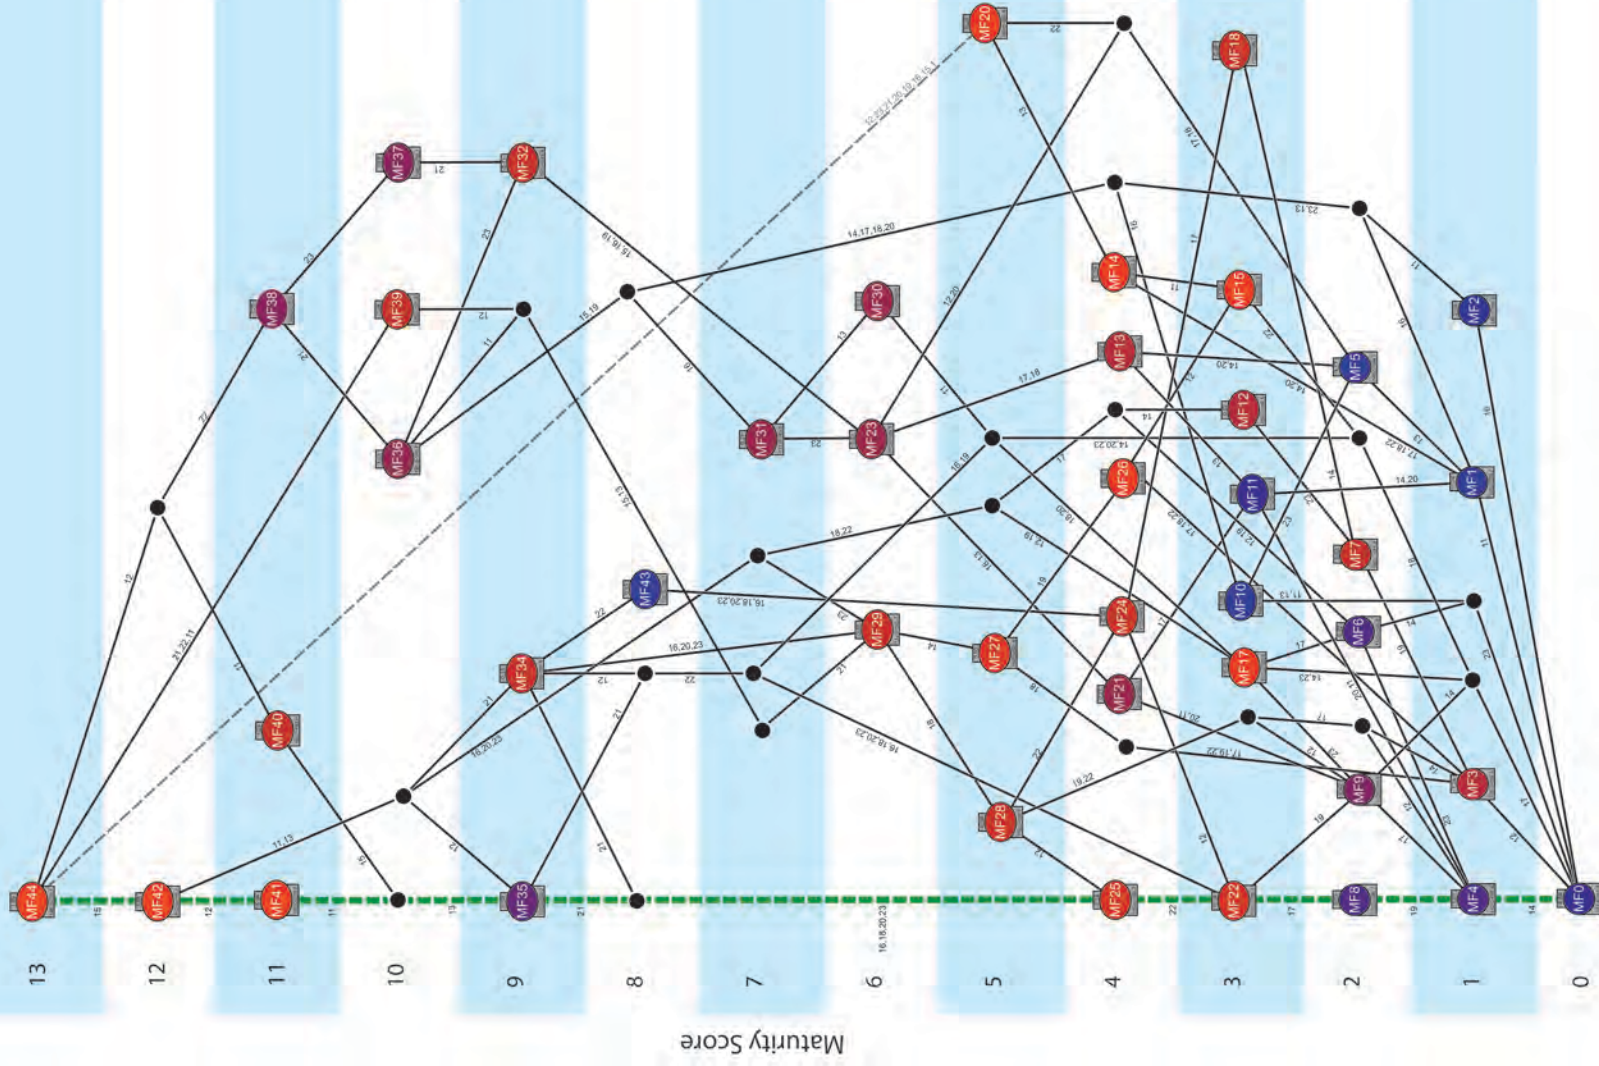

**Supplementary Figure 4.** Detailed ontogenetic sequence analysis reticulating diagram for the tibial, tarsal, and pedal dataset of 8 ontogenetic characters of *Coelophysis bauri*.

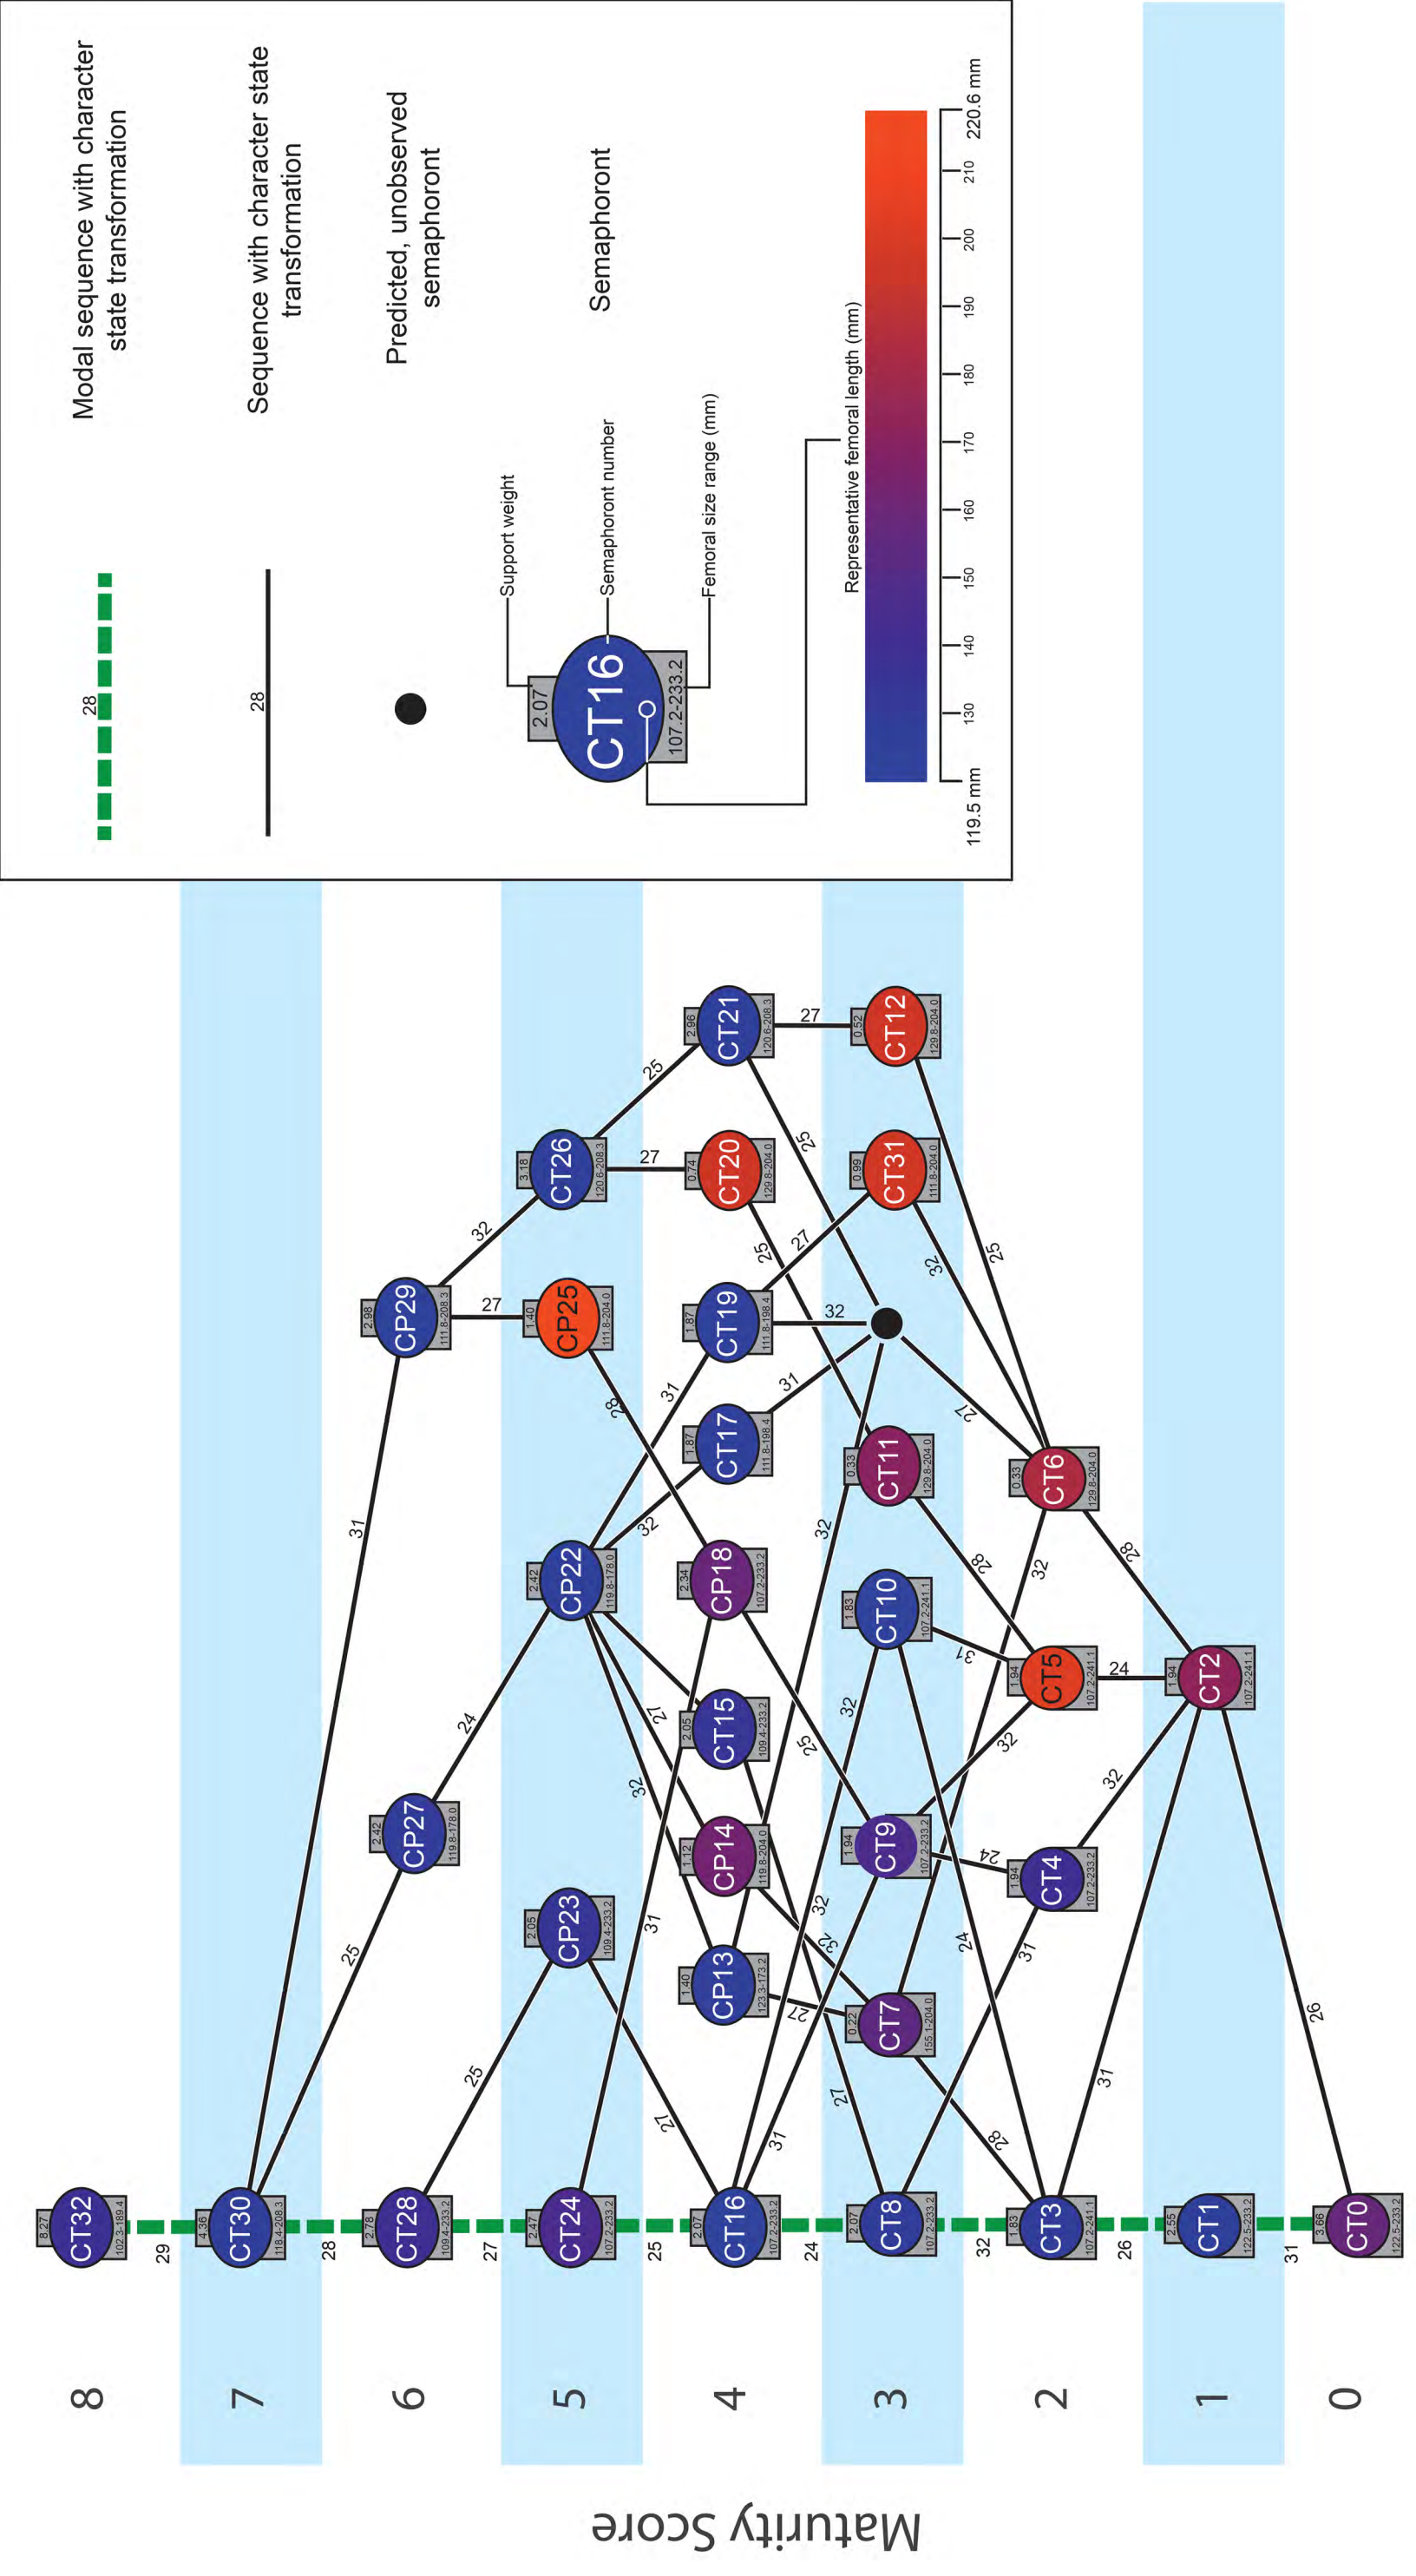

**Supplementary Figure 5.** Detailed ontogenetic sequence analysis reticulating diagram for the tibial and tarsal dataset of 6 ontogenetic characters of *Megapnosaurus rhodesiensis*.

Maturity Score

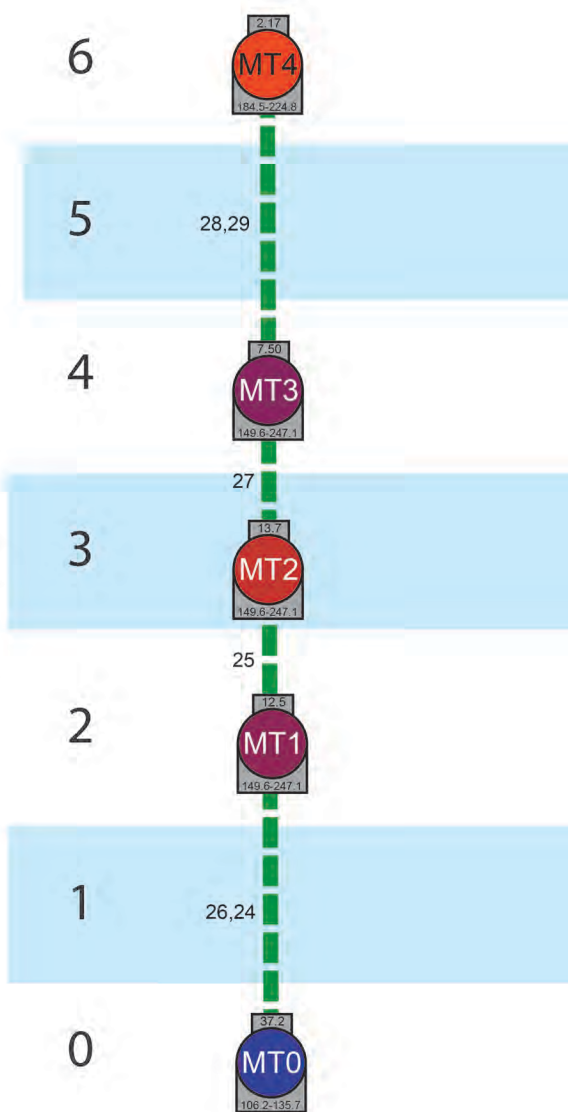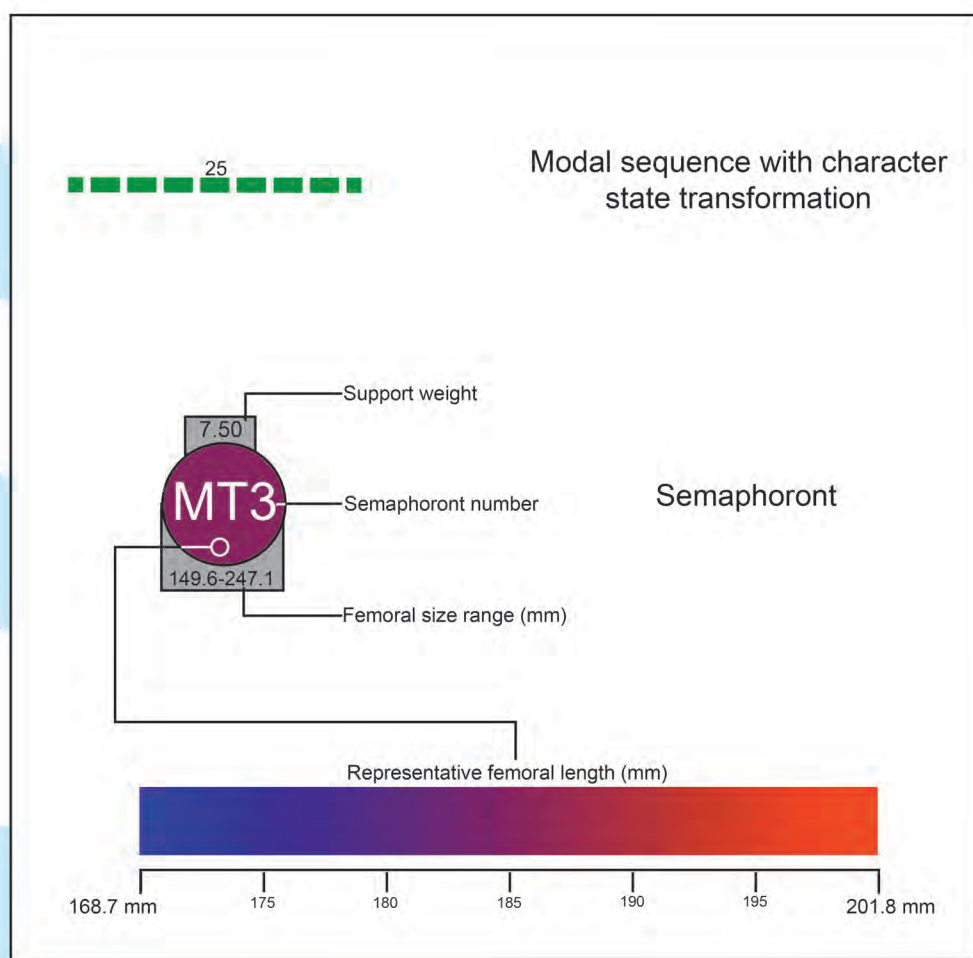

**Supplementary Figure 6.** Detailed ontogenetic sequence analysis reticulating diagram for the humeral dataset of 4 ontogenetic characters of *Megapnosaurus rhodesiensis*.

Maturity Score

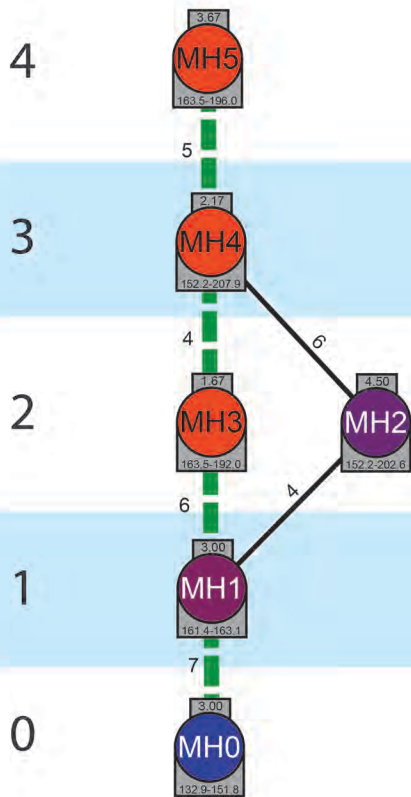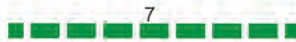

Modal sequence with character state transformation

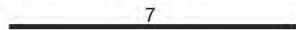

Sequence with character state transformation

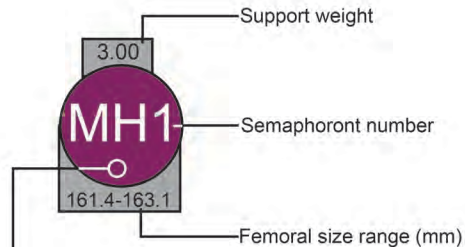

Semaphoront

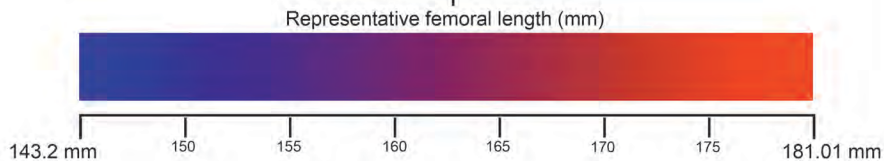

**Supplementary Figure 7.** Detailed ontogenetic sequence analysis reticulating diagram for the sacral and pelvic dataset of 6 ontogenetic characters of *Coelophysis bauri*.



Maturity Score

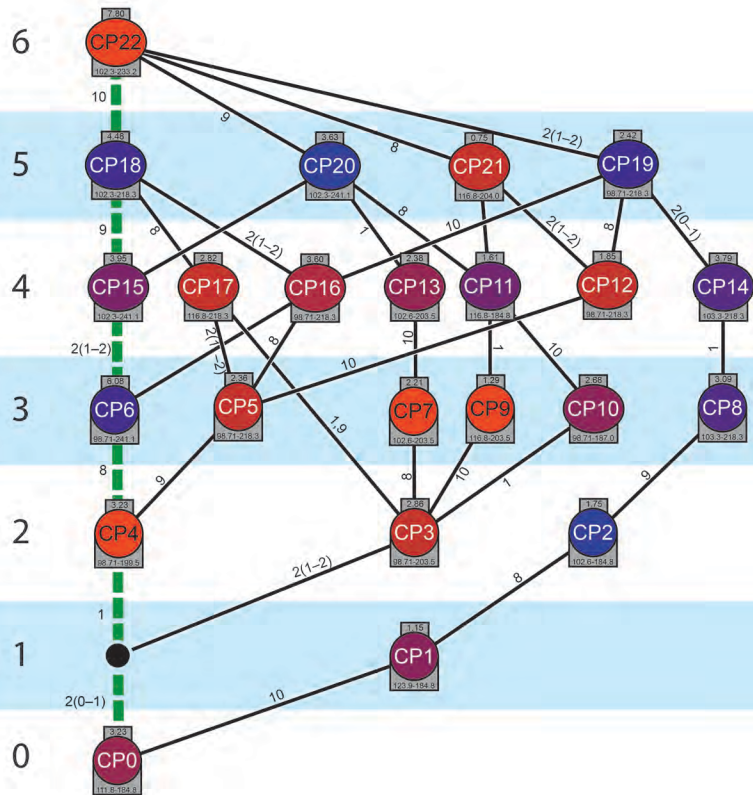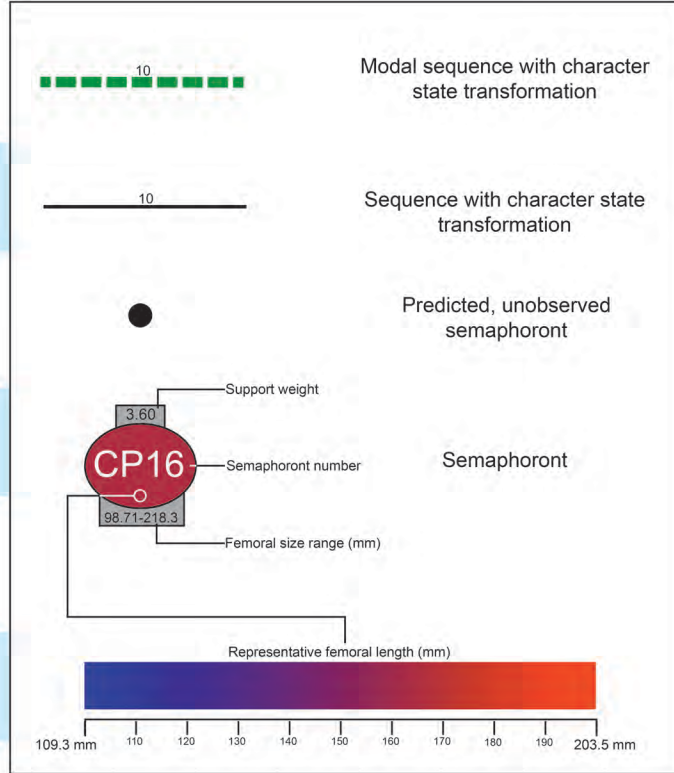

**Supplementary Figure 8.** Detailed ontogenetic sequence analysis reticulating diagram for the sacral and pelvic dataset of 6 ontogenetic characters of *Megapnosaurus rhodesiensis*.

Maturity Score

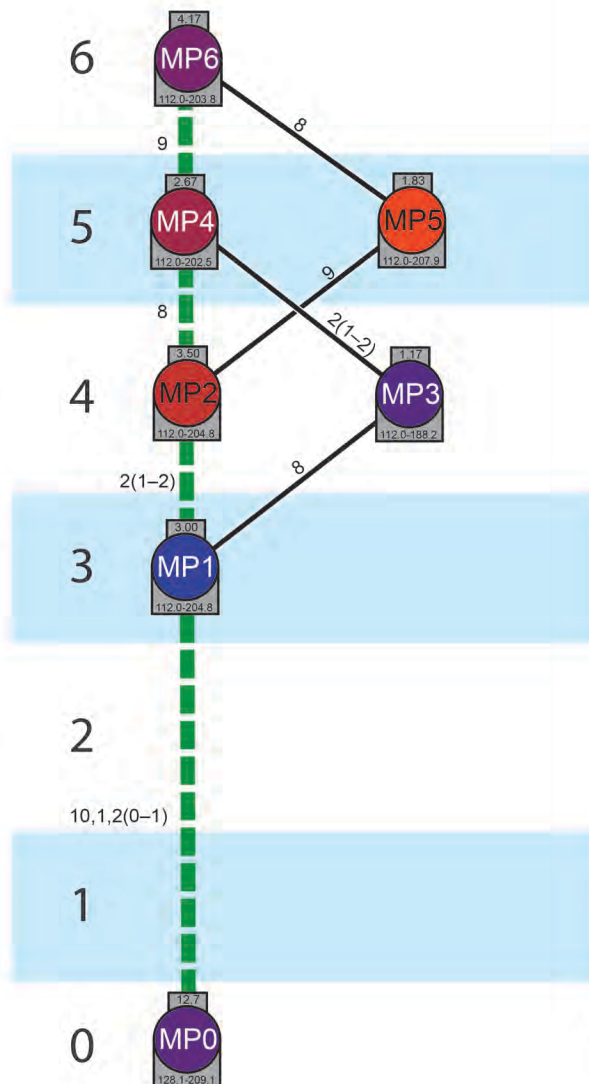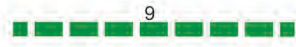

Modal sequence with character state transformation

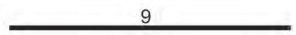

Sequence with character state transformation

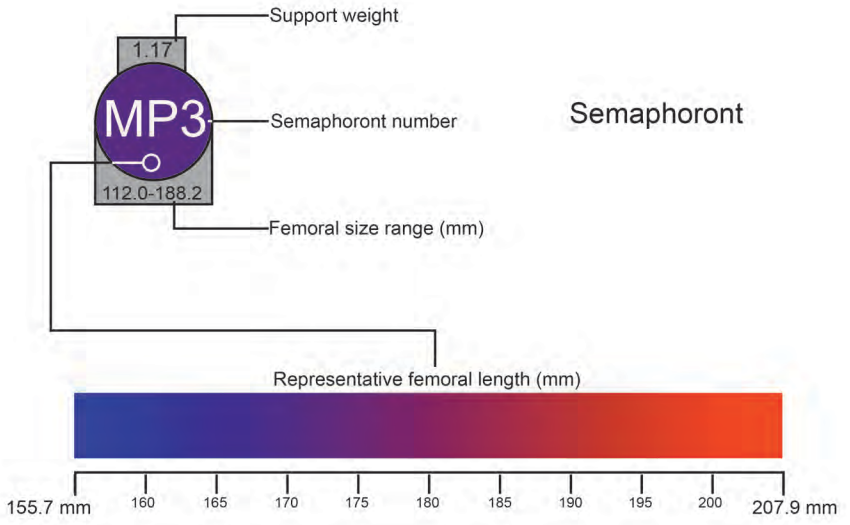

Semaphoront

**Supplementary Figure 9.** Detailed ontogenetic sequence analysis reticulating diagram for the suture fusion dataset of 12 ontogenetic characters of *Coelophysis bauri*.

Maturity vore

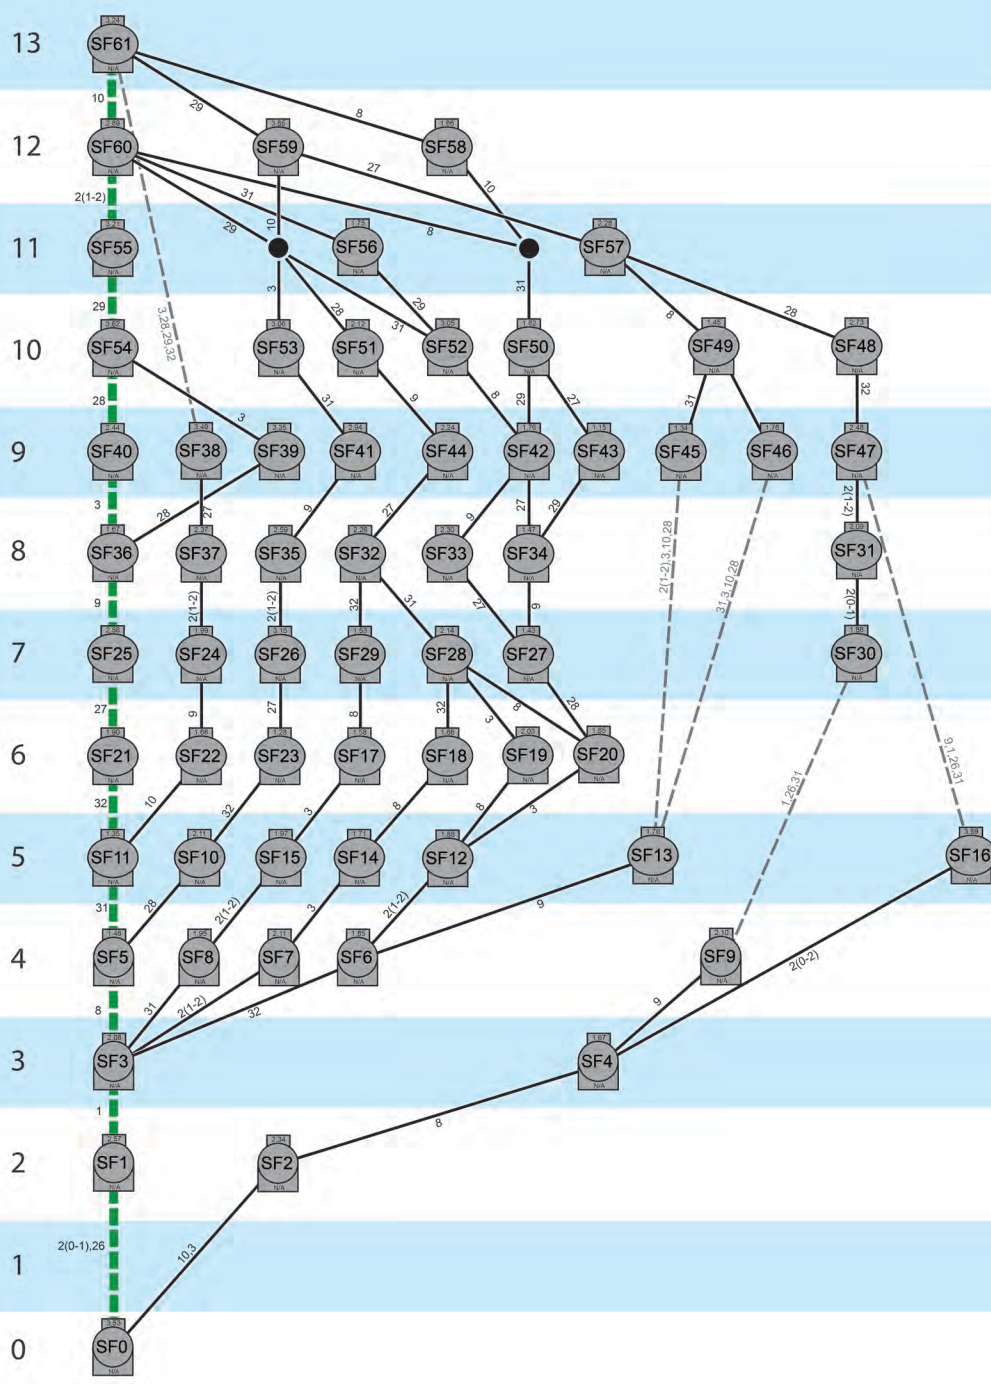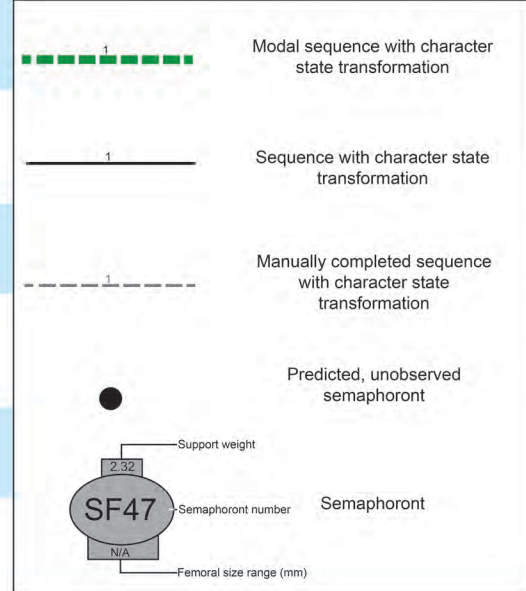

**Supplementary Figure 10.** Detailed ontogenetic sequence analysis reticulating diagram for the bone scar dataset of 15 ontogenetic characters of *Coelophysis bauri*.

Maturity Score

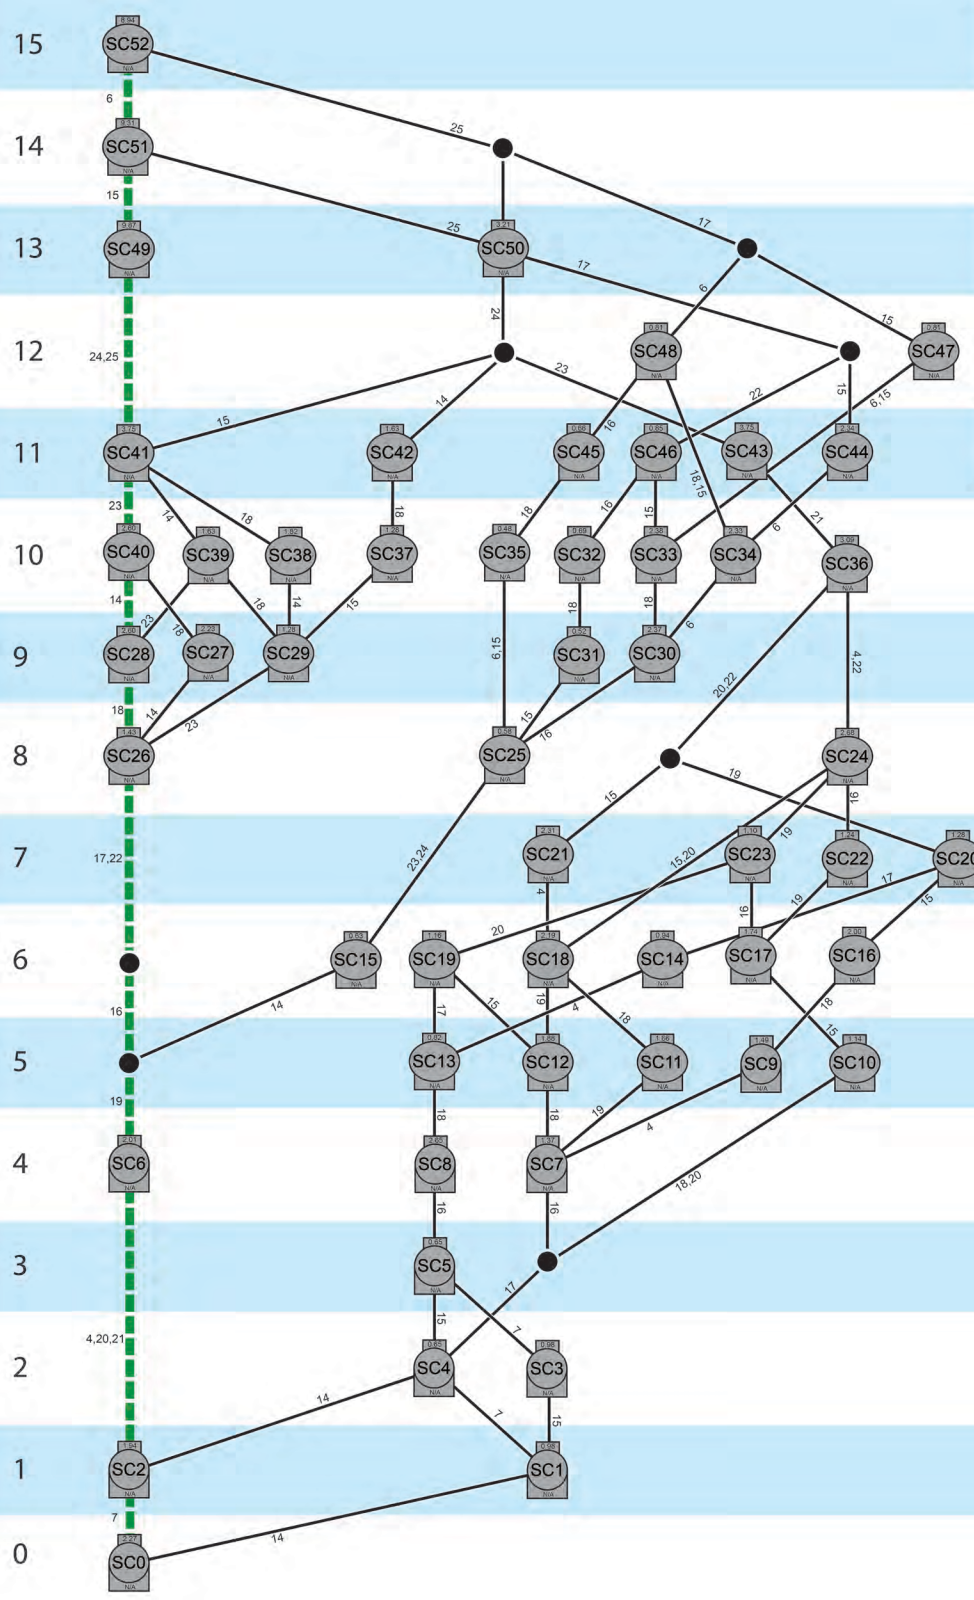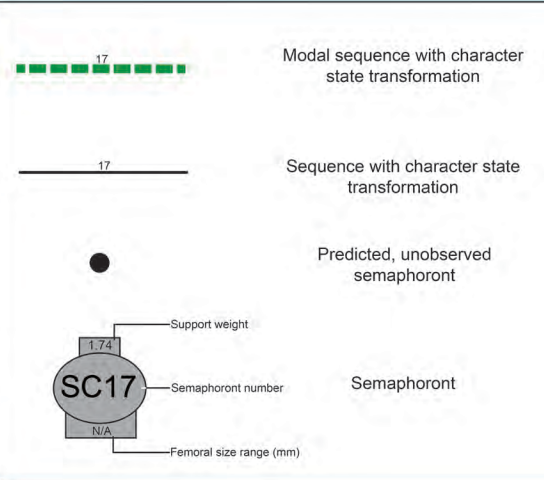

**Supplementary Figure 11.** The left tarsus and pes of a fairly large individual of *Coelophysis bauri* (YPM 41197). Note that, despite its large size (estimated femur length = 177.9 mm; see main text) it possesses a clear line of suture between part of the astragalus and calcaneum, indicating that these two elements were not yet completely co-ossified at death. The tibia and fibula are also not co-ossified to the astragalus and calcaneum, although metatarsal III and tarsal III are completely co-ossified. The right scapula and coracoid of this individual are also completely co-ossified (not pictured).



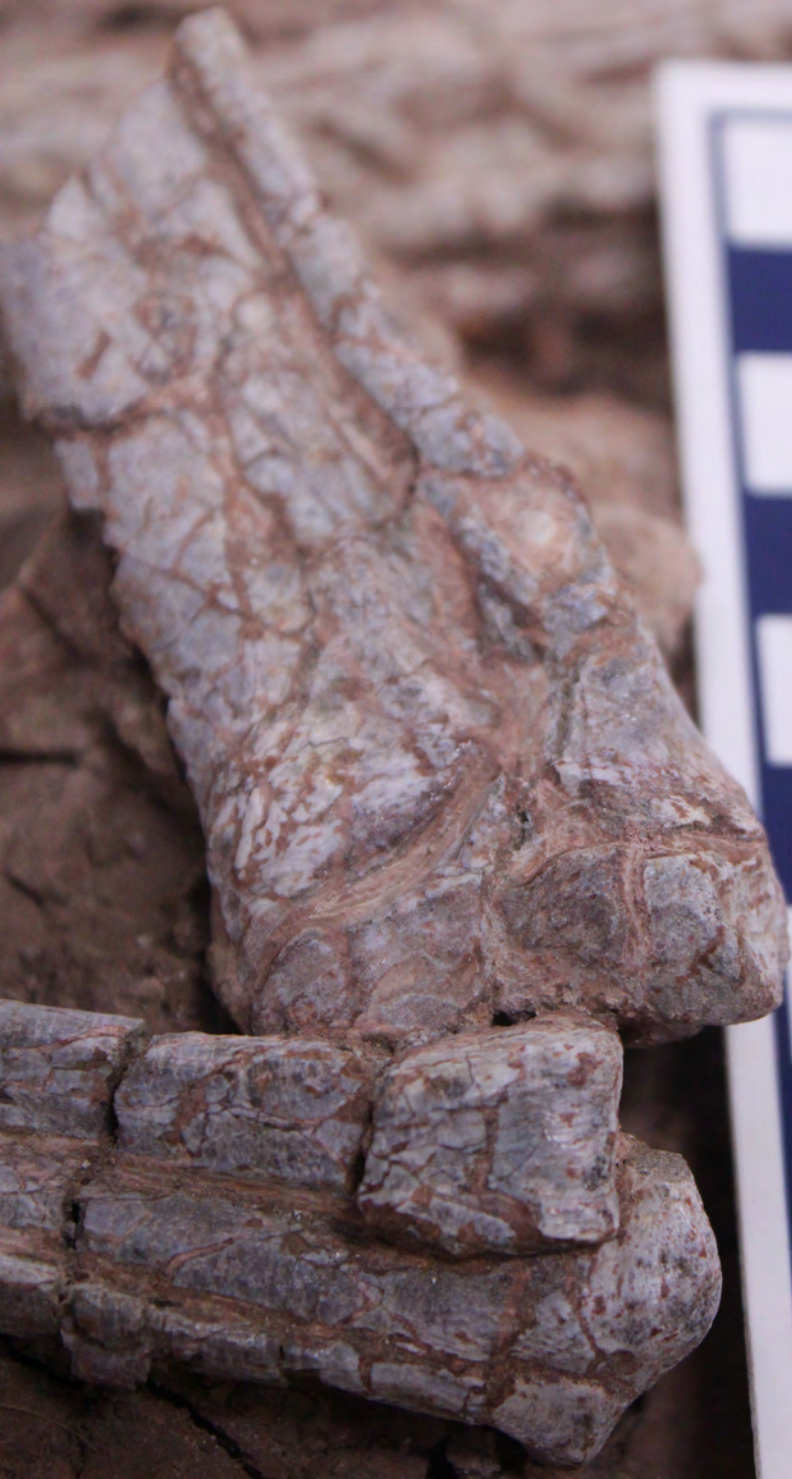

10 CM

**Supplementary Data 1.** Specimen scores for 27 ontogenetic characters of *Coelophysis bauri*. All characters are arranged sequentially (that is, the first score is character 1, the second score is character 2, and so on); but note that characters 5, 11, 12, and 30 are exclusive to *Megapnosaurus rhodesiensis*, and so are skipped in the sequential order of characters.

Individuals that were scored but possessed no specimen number are indicated by a number following a pound sign (#), listed by the museum which houses that individual. For specimen numbers that represent more than one individual, the scores of the different individuals are indicated by pound signs and sequential numbers following the specimen number.

|                 |                             |
|-----------------|-----------------------------|
| AMNH FARB 2705  | ?????001????????????????    |
| AMNH FARB 2706  | ?????0?0????????????????    |
| AMNH FARB 2708  | ???????0????????????????    |
| AMNH FARB 2704  | ?????????0?000????????????  |
| AMNH FARB 2722  | 1 1????????????????????     |
| AMNH FARB 2750  | 1 ??????????????????????    |
| AMNH FARB 30614 | ?????????????????????1110?? |
| AMNH FARB 30615 | ?????????????????????1110?? |
| AMNH FARB 30618 | ?????????111??1111????????  |
| AMNH FARB 30576 | ?????????????????????1000?? |
| AMNH FARB 7238  | ??1?????0101001?????111111  |
| AMNH FARB 7230  | ?0110111?0?1101???????????? |
| AMNH FARB 7232  | ?????0?????1?1?????1111??   |
| AMNH FARB 7231  | ?????1?11010011???????????? |

|                 |                               |
|-----------------|-------------------------------|
| AMNH FARB 7233  | ?1????100111110??????1????    |
| AMNH FARB 7236  | ??????0???100????????????     |
| AMNH FARB 7228  | ?1????01?11111??????10???1    |
| AMNH FARB 7229  | 1 1????1?0111110??????1110??  |
| AMNH FARB 7227  | 1 11????110101011???????????? |
| AMNH FARB 7325  | ??????1????????????????       |
| AMNH FARB 7256  | ????????????????????111011    |
| AMNH FARB 7234  | ??????110????????????1111??   |
| AMNH FARB 7223  | 1 2?10110?111111??????1000??  |
| AMNH FARB 7224  | 021????0?11?11????????0????   |
| AMNH FARB 7249  | ?2????01?0?1111??1????0????   |
| AMNH FARB 7248  | ??????11????????????????      |
| AMNH FARB 7244  | 0 ?????00010110??????100000   |
| AMNH FARB 7245  | ??????1???1??1????????????    |
| AMNH FARB 7246  | ??????01????????????????0?    |
| AMNH FARB 7247  | ?????????101110????00111001   |
| AMNH FARB 7251  | ??????00?101111????????????   |
| AMNH FARB 7253  | ????????????????????110011    |
| AMNH FARB 7250  | ????????????????????111011    |
| AMNH FARB 7252  | ?1????000110?111?0????????    |
| AMNH FARB 30647 | ??0????????????????????       |
| AMNH FARB 7243  | ????????????????11??????      |

|              |                                  |
|--------------|----------------------------------|
| AMNH FARB #1 | ?????????11011?????????????      |
| CM 89948     | ?????????????????????10?0??      |
| CM 89951     | ?????????????????????11000??     |
| CM 89255     | 1 ?????????????????????????0     |
| CM 81768     | ?21???000101101??????1000??      |
| CM 81766     | 1200010??11100?????????00??      |
| CM 81767     | ??0??00010110?????????000?0      |
| CM 81769     | 1 2?????????????????????????     |
| CM 81770     | ?????????????10?????????1100??   |
| CM 81768 #2  | ???101?????????????????????1     |
| CM 79083     | ?????????1111111111?????????     |
| CM 31390     | 12?????110???????????????????    |
| CM 81768     | ?1???????????????????????????    |
| CM 81774     | ?2?????10?101100??????0000?0     |
| CM 81775     | 1 ??????100111?0???????????????  |
| CM 81779     | ??????10?0?????????????100011    |
| CM 81778     | ?????????100110???????????????   |
| CM 76863     | ?????????????11??11????????????? |
| CM 31390     | ?2?????????????????????????????  |
| CM 89952     | ?????????0??000???????????????   |
| CM 81773     | 11?????1??111111???????????????  |
| CM 81771     | 12?????11?111111?????????11100?  |

|                |                                |
|----------------|--------------------------------|
| CM 89950       | ?????????111?1?111?????????    |
| CM 89954       | 1?????????????????????????     |
| CM 89958       | ?????????????????????????      |
| CM #1          | ?????????????????????1110??    |
| CM #2          | ?1?????????????????????????    |
| CM #3          | ?????????110110?????????????   |
| CM #4          | ???????????1???1110?????????   |
| CM #5          | ??????111????????????????????? |
| CMNH 10971 #1  | 1 ?????10?111111??????1000?0   |
| CMNH 10971 #2  | 1 ?????10?0?1?????????1100??   |
| CMNH 10971 #3  | 1 2????11?101111??????1100??   |
| CMNH 10971 #4  | ??????10?110000?????????????   |
| CMNH 10971 #5  | 1 ?????????101?0????0??1000??  |
| CMNH 10971 #6  | ??????1??111010?????????????   |
| CMNH 10971 #7  | ??????11?????????????????????  |
| CMNH 10971 #8  | ?????????????????????????11    |
| CMNH 10971 #9  | ?????????????????????11110??   |
| CMNH 10971 #10 | ?????????????????????11010??   |
| CMNH 10971 #11 | ??????0?0????????????????????? |
| CMNH 10971 #12 | ?????????????????????????11    |
| CMNH 10971 #13 | ?????????????????????1????00   |
| CMNH 10971 #14 | ?????????????????????1000??    |

|                |                                |
|----------------|--------------------------------|
| CMNH 10971 #15 | ??1?????1011111111001010??     |
| CMNH 10971 #16 | 1 2????111????????????????     |
| CMNH 10971 #17 | 1 2????111????????????????     |
| CMNH 10971 #18 | ????????11111110????????       |
| CMNH 10971 #19 | ????????101??1????????????     |
| CMNH 10971 #20 | ????????101??1????????????     |
| CMNH 10971 #21 | ?????10?1011?1????????????     |
| CMNH 10971 #22 | ????????????????????1010?0     |
| CMNH 10971 #23 | ????????????????111????????    |
| CMNH 10971 #24 | ????????????????????????11     |
| GR 649         | 1 2????1????????????????1110?? |
| GR 650         | ????????????????????0000??     |
| GR 651         | ????????????????????00?0??     |
| GR 652         | ??1????????????????????        |
| GR 653         | 1 ?????111????????????????     |
| GR 654         | ????????10111????????????      |
| GR 148         | ?2?????11111?1???11????0???    |
| GR 655         | ????????100000????????????     |
| GR 656         | ????????????????????????00     |
| GR 657         | ????????????????????0000??     |
| HMCZ 4334 #1   | ????????????11????????????1    |
| HMCZ 4334 #2   | 1 1????111101111????1??1???10  |

|               |                              |
|---------------|------------------------------|
| HMCZ 4334 #3  | ?1????????????????????       |
| HMCZ 4331 #1  | ?2????10?11??11?????1????1   |
| HMCZ 4331 #2  | ?????????10??1???????????    |
| HMCZ 4331#3   | ??????????????????????1      |
| HMCZ 4331 #4  | ?????1??11111??????????1     |
| HMCZ 4332 #1  | ??????????????1??????????1   |
| HMCZ 4332 #2  | ?1????11?111?1??11??1?1??11  |
| HMCZ 4332 #3  | ?????????11111?????????????  |
| HMCZ 9433     | ??????????????????00?????1?  |
| MNA V1960 #1  | ?????????101110????????????? |
| MNA V1960 #2  | ???????0?101??1?????1111???  |
| MNA V1960 #3  | ?????????111??????????1??0   |
| MNA V1960 #4  | ?????????????????????1000??  |
| MNA V3318     | ?10???10?10?????????1111000  |
| MNA #1        | ?????????101???11??????????? |
| MNA #2        | ??????????????111??????????? |
| MNA #3        | ??????????????111??????????? |
| MNA #4        | ???????1???????????????????  |
| MNA #5        | ??????11?101?1111??????????? |
| NMMNH P-42353 | ?001?1???1?0001????????????? |
| NMMNH P-42578 | ??1??0?????????????????????  |
| NMMNH P-42200 | ???1?1111111?1?1111?1111?11  |

|               |                               |
|---------------|-------------------------------|
| NMMNH P-55336 | ??????111????????????????     |
| NMMNH P-44552 | ?????????101111?????1?0???    |
| NMMNH P-42352 | ?11?????1?1011?1011011????    |
| NMMNH P-42351 | ?201??00011111?1111??1000??   |
| NMMNH P-50537 | ?????????101111??????1????    |
| NMMNH P-44554 | ??0????????????????????       |
| NMMNH P-55337 | ?????????????????????1110??   |
| NMMNH P-55344 | ?????????10111?1???????????   |
| NMMNH P-50536 | ?????????????????????11110?0  |
| NMMNH P-42586 | ?0????000101?110000???????    |
| NMMNH P-42577 | ??01?1????????????????????    |
| NMMNH P-42576 | ??1????????????????????????   |
| NMMNH P-55345 | ?????????????????????????01   |
| NMMNH P-50535 | ?????????????????????11?????? |
| NMMNH #1      | ?????????????????????11????   |
| SMP VP 1072   | ?????????1010?1????????????   |
| SMP VP 1306   | 11????000101110????????????   |
| SMP VP 1180   | ???????0?101111????????????   |
| SMP VP 858    | 12????1??101111??????111111   |
| SMP VP 630    | 12????100101011???11??00001   |
| SMP VP 1190   | ?2????111??????????????????   |
| SMP VP 3939   | ??????0??0?0000????????000??  |



|                         |                                |
|-------------------------|--------------------------------|
| SMP VP 3940             | ??????111????????????????      |
| SMP VP 1230             | ????????????1??111????????     |
| SMP VP #1               | ??????????????0000????????     |
| SMP VP #2               | ?????????0?0000????????????    |
| SMP VP #3               | 12????11???1??1??????1000??    |
| SMP VP #4               | ?0????????????????1111011      |
| SMP VP #5               | 1 2????????????????????????    |
| SMP VP #6               | ??????00????????00??1?1?01     |
| SMP VP #7               | ?11????????????????????????    |
| SMP VP #8               | ??????0?111??110????????????   |
| TMP 1984.063.0001 #1000 | ? ??0000?0000???000000000      |
| TMP 1984.063.0001 #212  | ? ???11?101?111111?1111001     |
| TMP 1984.063.0001 #3    | ??????00????????????????????   |
| TMP 1984.063.0001 #4    | ?11????????????????????????    |
| TMP 1984.063.0001 #5    | ?1??????????????????????????   |
| TMP 1984.063.0001 #6    | ?1??????????????????????????   |
| TMP 1984.063.0001 #7    | ????????????????????????1?1011 |
| TMP 1984.063.0001 #8    | ????????????????????????1000?? |
| TMP 1984.063.0001 #9    | ????????????????????001000??   |
| TMP 1984.063.0001 #10   | ??????0???111?11?1????????     |
| TMP 1984.063.0001 #11   | ????????????????????11110??    |
| TMP 1984.063.0001 #12   | ?????????1011????????????????  |

|                       |                              |
|-----------------------|------------------------------|
| TMP 1984.063.0001 #13 | ??????101????????????????    |
| TMP 1984.063.0001 #14 | ????????????????11?1???????? |
| TMP 1984.63.11        | ????????????????1??????      |
| TMP 1984.63.6         | ????????10111111?1??1111?    |
| TMP 1984.63.7         | ????????????????1??????      |
| TMP 1984.63.21        | ????????????????1111??       |

**Supplementary Data 2.** Specimen scores for 32 ontogenetic characters of *Megapnosaurus rhodesiensis*. Individuals that were scored but possessed no specimen number are indicated by a number following a pound sign (#). For specimen numbers that represent more than one individual, the scores of the different individuals are indicated by pound signs and sequential numbers following the specimen number.

|           |                                   |
|-----------|-----------------------------------|
| QG 691 #1 | ????????1000000000?00????????     |
| QG 727    | ? ?????????001111111111????????   |
| QG 9174   | ? ?????????000000000000????????   |
| QG 756    | ? ?????????1?1111??1100????????   |
| QG 715    | ????????000001000000????????      |
| QG 76     | ? ?????????????00011?0?10???????? |
| QG 733    | ? ?????????1111011111?1????????   |
| QG 717    | ? ?????????010000000000????????   |
| QG 714    | ????????0001?0100000????????      |
| QG 731    | ? ?????????101111111110????????   |
| QG 729    | ? ?????????1?1??1??111????????    |

QG 725 ??????????101101??111?????????  
QG 726 ??????????1011011111111?????????  
QG 716 ??????????0?0100?0100?0?????????  
QG 7131 ?????????????000?????????????  
QG 732 ??????????1?1?????1?1?????????  
QG 737 ??????????????1??11???1?????????  
QG 755 ??????????1011011111111?????????  
QG 753 ??????????101101??11111?????????  
QG 760 ??????????0001011111111?????????  
QG 754 ??????????1011011111111?????????  
QG 743 ??????????000??0??000?????????  
QG 741 ??????????01?????1?0?????????  
QG 745 ?????????????0000000??00?????????  
QG 748 ??????????????????00?????0?????????  
QG 728 ??????????111101??11111?????????  
QG 691 #2 ??????????000000000000?????????  
QG 738 ??????????00010?00000?????????  
QG 740 ??????????000001000000?????????  
QG 739 ??????????00000000000?????????  
QG 742 ??????????00000000000?????????  
QG 713 ??????????000000000000?????????  
QG1 1211011011111111111111111111000???

QG 174c ??????????1??100??0100??????????  
QG 174a ??????????000000??00??????????  
QG 735 ??????????1?1?????1?1??????????  
QG 805 ?????????????????????????1111001??  
#1? ?????????????????????????0000?00  
QG 761 ?????????????????????????0??00??  
QG 794 ?????????????????????????00??  
QG 793 ?????????????????????????0?0??  
QG 801 ?????????????????????????00??????  
QG 799 ?????????????????????????00??????  
QG 798 ?????????????????????????00??????  
QG 790 ?????????????????????????00??????  
QG 797 #1 ?????????????????????????00??????  
QG 797 #2 ?????????????????????????1100??  
QG 791 ?????????????????????????00??????  
QG 788 ?????????????????????????0?0??  
QG 765 ?????????????????????????0?0??  
QG 814 ?????????????????????????0?0??  
QG 800 ?????????????????????????11??????  
#4 ?????????????????????????00??????  
QG 806 ?????????????????????????1110??  
QG 803 ?????????????????????????1000??

QG 768 ?????????????????????????0000???

QG 799 #2 ?????????????????????????1100???

QG 795 ?????????????????????????0?????

QG 802 ?????????????????????????1000???

QG 764 ?????????????????????????0?0???

QG 169 ?????????????????????????11???????

QG 792 ?????????????????????????00?0?0???

QG 771 ?????????????????????????1000???

QG 767 ?????????????????????????1??0???

QG 772 ?????????????????????????00???????

QG 766 ?????????????????????????10???????

QG 691 #3 ?????????????????????????10???????

QG 763 ?????????????????????????00???????

QG 773 ?????????????????????????00???????

QG 762 ?????????????????????????00???????

QG 691#4 ?????????????????????????00???????

QG 816 ?????????????????????????0?0?????

QG 787 ?????????????????????????0?0?????

#2 ?????????????????????????0?0?????

#3 ?????????????????????????1?0?????

QG 816 #2 ?????????????????????????00???????

QG 820 ?????????????????????????00???????

QG 818 ?????????????????????????????00?????  
QG 776 ?????????????????????????????0?0??  
QG 777 ?????????????????????????????0?1??  
#6 ?????????????????????????????0?1??  
QG 813 ?????????????????????????????0?1??  
QG 811 ?????????????????????????????0?0??  
QG 812 ?????????????????????????????0?1??  
QG 808 ?????????????????????????????0?0??  
QG 807 ?????????????????????????????0?1??  
#5 ??????????????????????????????????0  
QG 1029 ??????????????????????????????????11  
QG 912 ??????????????????????????????????00  
QG 1050 ??????????????????????????????????11  
QG 768 #2 ?????????????????????????????0000??0  
QG 941 ??????????????????????????????????11  
QG 782 ?????????????????????????????10?????  
QG 817 ?????????????????????????????0?0????  
QG 785 ?????????????????????????????00?????  
QG 781 ?????????????????????????????000????  
QG 783 ?????????????????????????????100????  
QG 885 ??????????????????????????????????0  
QG 768 #3 ?????????????????????????????0000?00

QG 691 #5 ?????????????????????????00???????

QG 796 ?????????????????????????11???????

QG 127/E ?????????????????????????????1??

#7 ?????????????????????????????0??

QG 3A ?????????????????????????11???????

#8 ?????????????????????????0000???

#9 ?????????????????????????0?0???

#10 ?????????????????????????00???????

#11 ?????????????????????????0000???

#12 ?????????????????????????00000???

QG 700 ???????00???????????????????????

QG 692 ???????00???????????????????????

QG 698 ???????00???????????????????????

QG 699 ???????000???????????????????????

QG 691 #6 ???????000???????????????????????

QG 697 ???????000???????????????????????

#13 1?????????????????????????????????

QG 706 ?????????00???????????????????????

#14 ???????0?0???????????????????????

QG 705 ?????????00???????????????????????

QG 707 ?????????00???????????????????????

QG 701 ???????0?0???????????????????????

#15 ??????000????????????????????  
QG 695 12?????111????????????????????  
QG 179 #1 ?0????????????????????????????  
QG 45 ?????????????10????????????????  
QG 3A #2 ??????????111101??111??11??????  
QG 193 ??1????????????????????????????  
QG 512 ??0????????????????????????????  
QG 517 ??0????????????????????????????  
QG 518/B ??0????????????????????????????  
QG 519 ??0????????????????????????????  
QG 515 ??0????????????????????????????  
QG 528 ??0????????????????????????????  
QG 524 ??0????????????????????????????  
#16 ??0????????????????????????????  
QG 527 ??1????????????????????????????  
QG 526 ??0????????????????????????????  
QG 521 ??0????????????????????????????  
QG 526 ??0????????????????????????????  
QG 522 ??0????????????????????????????  
QG 535 ???1111????????????????????????  
QG 548 ???0001????????????????????????  
QG 514 ???1111????????????????????????



QG 541 ???1001????????????????????????????  
QG 546 ???100????????????????????????????  
QG 543 ???1111????????????????????????????  
QG 544 ???0000????????????????????????????  
QG 517 ???0000????????????????????????????  
QG 536 ???101????????????????????????????  
QG 551 ???10?1????????????????????????????  
QG 545 ???0000????????????????????????????  
QG 524/B ???0001????????????????????????????  
QG 514 ???1111????????????????????????????  
#17 ???0001????????????????????????????  
#18 ??????????101000000000????????????  
#19 ???????00????????????????????????  
QG 179 #2 ?1?????00????0000????0?????????  
QG 127/E ???????101????????????????????  
#20 ???????000?0010000????????????????  
#21 ??1????????????????????????????????  
#22 12????????????????????????????????  
QG 693 12????????????????????????????????  
QG 694 ???????1????????????????????????  
#23 ?0????????????????????????????????  
QG 696 12?????111????????????????????????

QG 5164 ?????????????????????????????0?????  
QG 770 ?????????????????????????11?100???  
QG 174 #1 ?????????????????????????11?1?????  
QG 174 #2 ??????????????????????????????????  
QG 174 #3 ?????????????????????????0?0???  
QG 174 #4 ?????????????????????????1000???  
QG 174 #5 ??1?????????????????????????????  
QG 174 #6 ??????00?????????????????????????  
QG 174 #7 ?????????????????????????????11  
QG 174 #8 ?????????????????????????100?????  
QG 174 #9 ?????1????????????????????0?0???  
QG 174 #10 ??1100?????????????????????????  
QG 174 #11 12?0011?0?????????????????????  
QG 174 #12 ?????1?????????????????????????  
QG 174 #13 ?????????????00????00?????????  
QG 174 #14 ?????????????1?111?1?1?????????  
QG 174 #15 ???100?????????????????????????  
QG 174 #16 12?????0?????????????????????????

**Supplementary Data 3.** NEXUS file of *Coelophysis bauri* specimens used for the full-body, 27-character ontogenetic sequence analysis. See attached NEXUS file.

**Supplementary Data 4.** NEXUS file of *Coelophysis bauri* specimens used for the femoral character ontogenetic sequence analysis. See attached NEXUS file.

**Supplementary Data 5.** NEXUS file of *Megapnosaurus rhodesiensis* specimens used for the femoral character ontogenetic sequence analysis. See attached NEXUS file.

**Supplementary Data 6.** NEXUS file of *Coelophysis bauri* specimens used for the tibial, tarsal, and pedal character ontogenetic sequence analysis. See attached NEXUS file.

**Supplementary Data 7.** NEXUS file of *Megapnosaurus rhodesiensis* specimens used for the tibial and tarsal character ontogenetic sequence analysis. See attached NEXUS file.

**Supplementary Data 8.** NEXUS file of *Megapnosaurus rhodesiensis* specimens used for the humeral character ontogenetic sequence analysis. See attached NEXUS file.

**Supplementary Data 9.** NEXUS file of *Coelophysis bauri* specimens used for the sacral and pelvic character ontogenetic sequence analysis. See attached NEXUS file.

**Supplementary Data 10.** NEXUS file of *Megapnosaurus rhodesiensis* specimens used for the sacral and pelvic character ontogenetic sequence analysis. See attached NEXUS file.

**Supplementary Data 11.** NEXUS file of *Coelophysis bauri* specimens used for the suture fusion character ontogenetic sequence analysis. See attached NEXUS file.

**Supplementary Data 12.** NEXUS file of *Coelophysis bauri* specimens used for the bone scar character ontogenetic sequence analysis. See attached NEXUS file.

**Supplementary Table 1.** Measurements taken from *Coelophysis bauri* specimens. All measurements in millimeters. "R" is right element, "L" is left element.

**Supplementary Table 2.** Measurements taken from *Megapnosaurus rhodesiensis* specimens. All measurements in millimeters. “R” is right element, “L” is left element.

**Supplementary Table 3.** Linear regressions used to estimate femoral length for *Coelophysis bauri* and *Megapnosaurus rhodesiensis*.
